# Supplementary material for: A Computed Tomography-Derived Radiomics Approach for Predicting Uncommon EGFR Mutation in Patients With NSCLC
Source: PubMed Central journal article supplement (PMC8716946; doi:10.3389/fonc.2021.722106), 2021-12-16
Supplement: DataSheet_1.pdf [file DataSheet_1.pdf]

TABLE S-1 | histological subtypes and EGFR mutation status of patients in the training and validation cohorts

|                          | Training cohort |          |       | Validation cohort |          |       |
|--------------------------|-----------------|----------|-------|-------------------|----------|-------|
|                          | Uncommon        | Uncommon | p     | Uncommon          | Uncommon | p     |
|                          | EGFR(+)         | EGFR(-)  |       | EGFR(+)           | EGFR(-)  |       |
| Histological subtype (%) |                 |          | 0.074 |                   |          | 0.051 |
| LPA                      | 8(9.3)          | 6(6.5)   |       | 1(4.8)            | -        |       |
| APA                      | 46(53.5)        | 55(59.1) |       | 9(42.9)           | 15(65.2) |       |
| PPA                      | 8(9.3)          | 18(19.4) |       | 1(4.8)            | 4(17.4)  |       |
| SPA                      | 13(15.1)        | 5(5.4)   |       | 4(19.0)           | -        |       |
| MPA                      | 6(7.0)          | 5(5.4)   |       | 3(14.3)           | -        |       |
| IMA                      | 2(2.3)          | 3(3.2)   |       | 2(9.5)            | 1(4.3)   |       |
| SCC                      | 3(3.5)          | 1(1.1)   |       | 1(4.8)            | 3(13.0)  |       |
| EGFR mutation (%)        |                 |          |       |                   |          |       |
| 20-INS                   | 17(19.8)        | -        |       | 6(28.6)           | -        |       |
| G719X                    | 27(31.4)        | -        |       | 6(28.6)           | -        |       |
| L861Q                    | 21(24.4)        | -        |       | 5(23.8)           | -        |       |
| S768I                    | 10(11.6)        | -        |       | 1(4.8)            | -        |       |
| mixed                    | 11(12.8)        | -        |       | 3(14.2)           | -        |       |
| 19Del                    | -               | 24(25.8) |       | -                 | 8(34.8)  |       |
| L858R                    | -               | 33(35.5) |       | -                 | 8(34.8)  |       |
| wild-type                | -               | 36(38.7) |       | -                 | 7(30.4)  |       |

**Abbreviations:** LPA:lepidic predominant adenocarcinomas, APA:acinar predominant adenocarcinoma; PPA:papillary predominant adenocarcinoma; MPA, micropapillary predominant adenocarcinoma; SPA,Solid predominant adenocarcinoma; IMA: invasive mucinous adenocarcinoma; SCC:Squamous cell carcinoma

TABLE S-2 | CT scanning parameters

| parameters                            | GE Discovery CT750 HD | Somatom Definition Flash |
|---------------------------------------|-----------------------|--------------------------|
| Tube voltage(kVp)                     | 120                   | 120                      |
| Tube current(mAs)                     | 200                   | 110                      |
| Pitch                                 | 0.984:1               | 1.0                      |
| Collimation(mm)                       | 0.625*64              | 0.6*64                   |
| Rotation time(s/rot)                  | 0.5                   | 0.33                     |
| SFOV(cm)                              | 50                    | 50                       |
| Slice thickness of reconstruction(mm) | 1.25                  | 1                        |
| Slice interval of reconstruction(mm)  | 1.25                  | 1                        |
| Reconstruction algorithm              | STND                  | Medium sharp             |

Rad\_Score =

-1.917\*original\_gldm\_DependenceEntropy+0.559\*original\_glszm\_SizeZoneNonUniformityNormalized+0.496\*original\_glcm\_JointAverage+0.399\*original\_glcm\_MaximumProbability+0.381\*original\_glszm\_SmallAreaEmphasis+0.337\*original\_glrlm\_ShortRunHighGrayLevelEmphasis+0.280\*wavelet-LHL\_glcm\_Autocorrelation+0.254\*original\_gldm\_DependenceVariance+0.229\*original\_glcm\_JointEnergy+0.170\*original\_gldm\_LargeDependenceHighGrayLevelEmphasis-0.17

2
